# Supplementary material for: Low-Pass Genome Sequencing-Based Detection of Paternity: Validation in Clinical Cytogenetics
Source: Genes (Basel). 2023 Jun 27;14(7):1357. doi: 10.3390/genes14071357 (PMC10379141; doi:10.3390/genes14071357)
Supplement: Supplementary file 1 [file genes-14-01357-s001.zip › Supplementary Tables.xlsx]

## Sheet: Table S1
Supplementary Table S1. 50 trios selected from the 1000 Genomes Project.
proband	mother	father
HG01084	HG01083	HG01082
HG00405	HG00404	HG00403
HG00408	HG00407	HG00406
HG00420	HG00419	HG00418
HG00423	HG00422	HG00421
HG00429	HG00428	HG00427
HG00438	HG00437	HG00436
HG00459	HG00458	HG00457
HG00474	HG00473	HG00472
HG00514	HG00513	HG00512
HG00526	HG00525	HG00524
HG00558	HG00557	HG00556
HG00561	HG00560	HG00559
HG00567	HG00566	HG00565
HG00591	HG00590	HG00589
HG00582	HG00581	HG00580
HG00585	HG00584	HG00583
HG00639	HG00638	HG00637
HG00642	HG00641	HG00640
HG00733	HG00732	HG00731
HG00738	HG00737	HG00736
HG00741	HG00740	HG00739
HG01050	HG01049	HG01048
HG01053	HG01052	HG01051
HG01056	HG01055	HG01054
HG01062	HG01061	HG01060
HG01068	HG01067	HG01066
HG01071	HG01070	HG01069
HG01074	HG01073	HG01072
HG01081	HG01080	HG01079
HG01087	HG01086	HG01085
HG01096	HG01095	HG01094
HG01099	HG01098	HG01097
HG01100	HG01248	HG01247
HG01169	HG01168	HG01167
HG01103	HG01102	HG01101
HG01114	HG01113	HG01112
HG01126	HG01125	HG01124
HG01135	HG01134	HG01133
HG01138	HG01137	HG01136
HG01141	HG01140	HG01139
HG01150	HG01149	HG01148
HG01252	HG01251	HG01250
HG01255	HG01254	HG01253
HG01258	HG01257	HG01256
HG01261	HG01260	HG01259
HG01273	HG01272	HG01271
HG01276	HG01275	HG01274
HG01279	HG01278	HG01277
HG01349	HG01348	HG01347

## Sheet: Table S2
Supplementary Table S2. Inconsistent rate of paternal or maternal inheritance from GS data of 10 trios in Phase I
	Small-insert library		Mate-pair library
	Mean (%)	SD (%)	Mean (%)	SD (%)
Biological trios (for paternity)	18.7	1.89	18.5	1.33
Biological trios (for maternity)	18	3.03	17.2	1.05
Trios with non-biological father	38.5	1.19	44.9	1.76
Trios with non-biological mother	37.7	1.12	44.6	1.59
Trios with neither of non-biological parents	28.1	2.67	30.8	1.9
Biological duos: proband-father	18.8	0.67	17.5	0.52
Biological duos: proband-mother	18.3	0.46	17.3	0.35
Duos with non-biological father	38.4	1.02	38.7	0.64
Duos with non-biological mother	37.9	1	38.1	0.79
*SD refers to standard deviation

## Sheet: Table S3
Supplementary Table S3. Evaluation of the optimal parameter with different sequencing parameters in trio-based analysis
Trio	Parameter	Trios (for paternity)	Trios (for maternity)	Trios with non-biological father	Trios with non-biological mother	Non-biological fetus (paternity)	Non-biological fetus (maternity)
Trio 1	4X PE 150bp	0.129931	0.118667	0.597616	0.496747	0.338499	0.312182
Trio 2	4X PE 150bp	0.125546	0.130079	0.494954	0.499556	0.32214	0.323055
Trio 3	4X PE 150bp	0.120228	0.124523	0.510175	0.508029	0.438503	0.256624
Trio 4	4X PE 150bp	0.131633	0.133642	0.496205	0.495376	0.321742	0.328081
Trio 5	4X PE 150bp	0.128195	0.128276	0.496129	0.497159	0.326533	0.326058
Trio 1	3X PE 150bp	0.153184	0.14321	0.597384	0.497879	0.344207	0.318976
Trio 2	3X PE 150bp	0.149506	0.151544	0.495303	0.499418	0.329856	0.328874
Trio 3	3X PE 150bp	0.143665	0.145608	0.506803	0.509073	0.440234	0.264777
Trio 4	3X PE 150bp	0.155111	0.155074	0.49585	0.497139	0.330803	0.33155
Trio 5	3X PE 150bp	0.15068	0.153277	0.496915	0.498556	0.331997	0.332677
Trio 1	2X PE 150bp	0.174156	0.159852	0.584982	0.495837	0.339753	0.330135
Trio 2	2X PE 150bp	0.176146	0.172859	0.483242	0.484733	0.327337	0.335148
Trio 3	2X PE 150bp	0.166177	0.172402	0.497226	0.502643	0.436601	0.264098
Trio 4	2X PE 150bp	0.177535	0.172335	0.493663	0.493944	0.340489	0.33545
Trio 5	2X PE 150bp	0.172186	0.171901	0.484639	0.487917	0.330498	0.344208
Trio 1	1X PE 150bp	0.185009	0.144934	0.450204	0.408455	0.264062	0.301074
Trio 2	1X PE 150bp	0.134525	0.168907	0.357579	0.362835	0.250738	0.289826
Trio 3	1X PE 150bp	0.187875	0.139043	0.304024	0.394057	0.333374	0.221664
Trio 4	1X PE 150bp	0.188883	0.162852	0.328806	0.322897	0.268319	0.273076
Trio 5	1X PE 150bp	0.167737	0.201388	0.334968	0.317196	0.253111	0.299694
Trio 1	4X PE 100bp	0.124955	0.117679	0.51334	0.499671	0.339681	0.310445
Trio 2	4X PE 100bp	0.121931	0.124638	0.495504	0.498564	0.323592	0.321529
Trio 3	4X PE 100bp	0.115964	0.121802	0.496374	0.50249	0.323008	0.323165
Trio 4	4X PE 100bp	0.124043	0.125269	0.494201	0.492811	0.329926	0.327173
Trio 5	4X PE 100bp	0.123461	0.124508	0.505891	0.502141	0.320306	0.330891
Trio 1	3X PE 100bp	0.150002	0.142108	0.511103	0.501476	0.345999	0.318604
Trio 2	3X PE 100bp	0.14626	0.14919	0.496788	0.502376	0.331297	0.329205
Trio 3	3X PE 100bp	0.140624	0.144428	0.498399	0.501193	0.329673	0.328793
Trio 4	3X PE 100bp	0.149102	0.15038	0.496438	0.495246	0.337071	0.335174
Trio 5	3X PE 100bp	0.149733	0.147624	0.504099	0.500843	0.331621	0.334606
Trio 1	2X PE 100bp	0.180422	0.167972	0.514505	0.493547	0.347909	0.320304
Trio 2	2X PE 100bp	0.171877	0.170607	0.487728	0.50022	0.330613	0.339784
Trio 3	2X PE 100bp	0.163653	0.169911	0.494986	0.494078	0.330963	0.329502
Trio 4	2X PE 100bp	0.173974	0.172817	0.496621	0.487717	0.340243	0.33757
Trio 5	2X PE 100bp	0.176542	0.17064	0.495243	0.496164	0.339826	0.335063
Trio 1	1X PE 100bp	0.19596	0.18163	0.391394	0.374161	0.229447	0.281647
Trio 2	1X PE 100bp	0.177433	0.17206	0.391778	0.376111	0.271541	0.310448
Trio 3	1X PE 100bp	0.171752	0.153532	0.379134	0.37398	0.271165	0.32283
Trio 4	1X PE 100bp	0.172744	0.23668	0.363963	0.363543	0.298051	0.271532
Trio 5	1X PE 100bp	0.221391	0.154963	0.396996	0.397772	0.302891	0.252273
Trio 1	0.5X PE 100bp	0.178788	0.111364	0.165416	0.113636	0.0676407	0.155505
Trio 2	0.5X PE 100bp	0.133983	0.100884	0.186664	0.0376804	0.119318	0.173972
Trio 3	0.5X PE 100bp	0.0614177	0.184073	0.146717	0.116867	0.163582	0.0796537
Trio 4	0.5X PE 100bp	0.128571	0.137662	0.134699	0.172199	0.144107	0.166506
Trio 5	0.5X PE 100bp	0.0864407	0.0829398	0.219697	0.16756	0.191973	0.07886
Trio 1	4X SE 150bp	0.127583	0.115133	0.598755	0.496943	0.339462	0.308967
Trio 2	4X SE 150bp	0.12007	0.121349	0.495128	0.501546	0.322297	0.321904
Trio 3	4X SE 150bp	0.115903	0.115863	0.510766	0.504542	0.440373	0.251631
Trio 4	4X SE 150bp	0.122426	0.121987	0.50032	0.499665	0.330173	0.326882
Trio 5	4X SE 150bp	0.1208	0.122692	0.499454	0.496073	0.324024	0.32543
Trio 1	3X SE 150bp	0.152467	0.137019	0.599675	0.496943	0.347248	0.314747
Trio 2	3X SE 150bp	0.14462	0.146349	0.495704	0.501546	0.329465	0.32966
Trio 3	3X SE 150bp	0.138438	0.141154	0.511287	0.504542	0.446416	0.259172
Trio 4	3X SE 150bp	0.14816	0.14626	0.499441	0.499665	0.337571	0.334205
Trio 5	3X SE 150bp	0.14731	0.146722	0.501565	0.496073	0.331767	0.333755
Trio 1	2X SE 150bp	0.185424	0.15929	0.592455	0.489833	0.350872	0.314595
Trio 2	2X SE 150bp	0.1664	0.169978	0.489092	0.500025	0.328859	0.331593
Trio 3	2X SE 150bp	0.159575	0.163911	0.506627	0.508201	0.443145	0.268834
Trio 4	2X SE 150bp	0.171735	0.172456	0.494726	0.490794	0.342705	0.33781
Trio 5	2X SE 150bp	0.169693	0.17269	0.50009	0.491011	0.331483	0.341651
Trio 1	1X SE 150bp	0.179696	0.134076	0.455459	0.327296	0.305656	0.237982
Trio 2	1X SE 150bp	0.171889	0.142778	0.399073	0.382054	0.242684	0.306959
Trio 3	1X SE 150bp	0.192236	0.14431	0.375419	0.39523	0.383758	0.207023
Trio 4	1X SE 150bp	0.169704	0.17735	0.367869	0.313552	0.299071	0.287636
Trio 5	1X SE 150bp	0.178799	0.222411	0.404945	0.344549	0.271093	0.28182
Trio 6 (mate-pair libraries)	1X PE 100bp	0.200646	0.178929	0.477648	0.440872	0.328037	0.317962
Trio 7 (mate-pair libraries)	1X PE 100bp	0.171787	0.156786	0.423367	0.445836	0.318743	0.276343
Trio 8 (mate-pair libraries)	1X PE 100bp	0.193881	0.164363	0.446238	0.419483	0.312984	0.330239
Trio 9 (mate-pair libraries)	1X PE 100bp	0.167129	0.186229	0.443797	0.466515	0.29047	0.322329
Trio 10 (mate-pair libraries)	1X PE 100bp	0.193128	0.174628	0.454755	0.456684	0.277185	0.306618

## Sheet: Table S4
Supplementary Table S4. Evaluation of the optimal parameter with different sequencing parameters in duo-based analysis
Duo	Parameter	Duos (for paternity)	Duos with non-biological father	Duos (for maternity)	Duos with non-biological mother
Duo 1	4X PE 150bp	0.0650137	0.325772	0.0604147	0.321833
Duo 2	4X PE 150bp	0.0613706	0.320829	0.0642457	0.323356
Duo 3	4X PE 150bp	0.0609946	0.320132	0.0644539	0.324534
Duo 4	4X PE 150bp	0.0666413	0.319376	0.0678459	0.320097
Duo 5	4X PE 150bp	0.0621771	0.330885	0.0629003	0.317406
Duo 1	3X PE 150bp	0.0930463	0.345762	0.086372	0.34229
Duo 2	3X PE 150bp	0.0901618	0.342258	0.0933549	0.344689
Duo 3	3X PE 150bp	0.0869864	0.340184	0.0906286	0.344463
Duo 4	3X PE 150bp	0.0957223	0.362428	0.0977662	0.341324
Duo 5	3X PE 150bp	0.121825	0.352001	0.0902877	0.3375
Duo 1	2X PE 150bp	0.129944	0.37113	0.119566	0.368455
Duo 2	2X PE 150bp	0.125462	0.366557	0.128662	0.368148
Duo 3	2X PE 150bp	0.121345	0.365214	0.123881	0.368732
Duo 4	2X PE 150bp	0.131419	0.366313	0.132179	0.366923
Duo 5	2X PE 150bp	0.126185	0.380254	0.125839	0.359497
Duo 1	1X PE 150bp	0.171741	0.38783	0.157015	0.394495
Duo 2	1X PE 150bp	0.168461	0.389668	0.171124	0.387531
Duo 3	1X PE 150bp	0.160934	0.383224	0.162701	0.388272
Duo 4	1X PE 150bp	0.169264	0.387144	0.174632	0.381301
Duo 5	1X PE 150bp	0.16676	0.394495	0.160581	0.376099
Duo 1	4X PE 100bp	0.103721	0.355013	0.148563	0.350986
Duo 2	4X PE 100bp	0.0976135	0.350103	0.0997227	0.352295
Duo 3	4X PE 100bp	0.0950957	0.348683	0.0988656	0.35269
Duo 4	4X PE 100bp	0.101103	0.348078	0.102033	0.348789
Duo 5	4X PE 100bp	0.0973385	0.364062	0.097646	0.346055
Duo 1	3X PE 100bp	0.131037	0.372683	0.11933	0.371226
Duo 2	3X PE 100bp	0.123349	0.370836	0.126408	0.372848
Duo 3	3X PE 100bp	0.119381	0.367832	0.124223	0.370987
Duo 4	3X PE 100bp	0.128191	0.368629	0.128484	0.368325
Duo 5	3X PE 100bp	0.123492	0.38538	0.122388	0.365023
Duo 1	2X PE 100bp	0.168042	0.394733	0.148563	0.394326
Duo 2	2X PE 100bp	0.153628	0.390442	0.156525	0.393736
Duo 3	2X PE 100bp	0.151803	0.389244	0.15325	0.389813
Duo 4	2X PE 100bp	0.157551	0.389554	0.158167	0.388266
Duo 5	2X PE 100bp	0.153425	0.410708	0.152436	0.383554
Duo 1	1X PE 100bp	0.197372	0.381558	0.176364	0.369166
Duo 2	1X PE 100bp	0.188542	0.383574	0.183835	0.395178
Duo 3	1X PE 100bp	0.184468	0.373455	0.186253	0.386965
Duo 4	1X PE 100bp	0.177531	0.377329	0.189642	0.373595
Duo 5	1X PE 100bp	0.191448	0.40293	0.180589	0.37194
Duo 1	0.5X PE 100bp	0.173768	0.122831	0.229066	0.202138
Duo 2	0.5X PE 100bp	0.136696	0.131416	0.208711	0.220328
Duo 3	0.5X PE 100bp	0.154046	0.170662	0.202834	0.220468
Duo 4	0.5X PE 100bp	0.135172	0.13567	0.204278	0.210207
Duo 5	0.5X PE 100bp	0.154768	0.109321	0.2583	0.208307
Duo 1	4X SE 150bp	0.131034	0.368425	0.115043	0.363859
Duo 2	4X SE 150bp	0.121252	0.364725	0.12257	0.368021
Duo 3	4X SE 150bp	0.116993	0.362554	0.118274	0.366937
Duo 4	4X SE 150bp	0.123654	0.362181	0.124267	0.363592
Duo 5	4X SE 150bp	0.121224	0.383966	0.121011	0.35945
Duo 1	3X SE 150bp	0.15725	0.381652	0.135368	0.377544
Duo 2	3X SE 150bp	0.143007	0.378728	0.144247	0.381915
Duo 3	3X SE 150bp	0.137151	0.376791	0.139769	0.379789
Duo 4	3X SE 150bp	0.145929	0.379275	0.146823	0.379044
Duo 5	3X SE 150bp	0.142721	0.403488	0.1423	0.372424
Duo 1	2X SE 150bp	0.168042	0.394733	0.148563	0.394326
Duo 2	2X SE 150bp	0.153628	0.390442	0.156525	0.393736
Duo 3	2X SE 150bp	0.151803	0.389244	0.15325	0.389813
Duo 4	2X SE 150bp	0.157551	0.389554	0.158167	0.388266
Duo 5	2X SE 150bp	0.153425	0.410708	0.152436	0.383554
Duo 1	1X SE 150bp	0.226116	0.330358	0.168219	0.317697
Duo 2	1X SE 150bp	0.175915	0.350565	0.164825	0.334646
Duo 3	1X SE 150bp	0.190819	0.318954	0.178245	0.339732
Duo 4	1X SE 150bp	0.167731	0.338926	0.173551	0.320446
Duo 5	1X SE 150bp	0.17436	0.397926	0.178812	0.307658
Duo 6(mate-pair libraries)	1X PE 100bp	0.174435	0.391681	0.171987	0.390281
Duo 7(mate-pair libraries)	1X PE 100bp	0.176997	0.379322	0.173699	0.378387
Duo 8(mate-pair libraries)	1X PE 100bp	0.18169	0.378515	0.175745	0.389385
Duo 9(mate-pair libraries)	1X PE 100bp	0.165701	0.392445	0.166253	0.37167
Duo 10(mate-pair libraries)	1X PE 100bp	0.176216	0.391844	0.175901	0.372968

## Sheet: Table S5
Supplementary Table S5. Analytical results among 100 trios with small-insert libraries and sequenced by MGISeq-2000
Family	Trios (pat)	Trios (mat)	Duos (pat)	Duos (mat)
20C1991_aCGH20513_aCGH20514	0.183094	0.196666	0.179518	0.186622
aCGH19574_aCGH21080_aCGH21081	0.157284	0.194863	0.188823	0.179461
aCGH19630_aCGH19631_aCGH19632	0.155462	0.184005	0.183528	0.189247
aCGH21002_aCGH21003_aCGH21004	0.155385	0.172455	0.191358	0.193858
21C0158-E_aCGH21643_aCGH21644	0.174915	0.144648	0.188069	0.183197
21C0536_21C0554_21C0555	0.195015	0.181735	0.193859	0.193219
21C0611_21C0631_21C0632	0.168545	0.159712	0.191483	0.185863
21C0935_21C0936_21C0937	0.15391	0.145346	0.189322	0.20159
21C0938_21C0939_21C0940	0.164866	0.175241	0.196723	0.195118
21C0788_21C1034_21C1035	0.167624	0.201835	0.185813	0.196602
21C01848_21C01849_21C01850	0.156333	0.185459	0.18749	0.195708
21C1152_21C1312_21C1313	0.182322	0.214534	0.18667	0.190746
21C1194_21C1676_21C1677	0.160633	0.16907	0.190268	0.193606
21C1215_aCGH22818_aCGH22819	0.183358	0.195055	0.205238	0.205996
21C1279_aCGH22876_aCGH22877	0.168118	0.159878	0.23093	0.219012
21C1302_21C1303_21C1304	0.179755	0.169796	0.18485	0.193974
21C1309_21C1310_21C1311	0.184356	0.175579	0.188033	0.185568
21C1322_21C1323_21C1324	0.176777	0.161907	0.190949	0.185674
21C1377_21C1466_21C1467	0.159101	0.199977	0.203164	0.208706
21C1493_21C2262_21C2263	0.189019	0.197059	0.186109	0.193356
21C1537_21C1763_21C1764	0.207597	0.181013	0.196364	0.187484
21C1673_21C1674_21C1675	0.170972	0.166633	0.184398	0.189188
21C1894_21C1895_21C1896	0.190374	0.178281	0.192844	0.19011
21C1914_aCGH23445_aCGH23446	0.177724	0.190525	0.189137	0.19027
21C1945_21C1946_21C1947	0.175363	0.191192	0.17873	0.187731
21C2090_21C2092_21C2098	0.175998	0.144537	0.212701	0.200954
21C2095_21C2096_21C2097	0.179285	0.135131	0.221194	0.213077
21C2431_21C2433_21C2434	0.176141	0.15827	0.201073	0.21604
21C2435_aCGH24016_aCGH24017	0.148979	0.198766	0.180742	0.181093
21C2539_21C2540_21C2541	0.188465	0.173557	0.232746	0.222698
21C2649_21C2650_21C2651	0.182709	0.192005	0.183137	0.184376
21C2660_21C2661_21C2662	0.187194	0.210439	0.183844	0.183391
21C2676_21C2677_21C2678	0.159562	0.217393	0.188512	0.211925
21C2691_21C2692_21C2693	0.210871	0.208272	0.18134	0.183888
21C2822_21C2823_21C2824	0.188783	0.171387	0.191058	0.193812
aCGH22575_aCGH22576_aCGH22577	0.165987	0.184406	0.171394	0.178412
21C2852_21C2874_21C2875	0.180916	0.138064	0.193055	0.189293
21C2653_21C2912_21C2913	0.213007	0.158596	0.214037	0.199571
21C2732_21C2970_21C2971	0.182386	0.194199	0.181666	0.184377
21C2941_21C2748_21C2749	0.183696	0.171102	0.183056	0.183319
21C2982_21C2983_21C2984	0.184826	0.156525	0.181867	0.192168
21C2997_21C2998_21C2999	0.20611	0.196051	0.222937	0.234561
21C2932_aCGH24427_aCGH24428	0.204183	0.152102	0.198017	0.203342
21C3021_21C3152_21C3153	0.196312	0.182267	0.188055	0.19153
21C1958_21C3197_21C3198	0.170726	0.175636	0.191565	0.181545
21C3035_21C3123_21C3124	0.168041	0.175216	0.180918	0.187859
21C3247_21C3248_21C3249	0.205247	0.144134	0.197489	0.187821
21C3229_21C3336_21C3337	0.234185	0.182906	0.189018	0.180973
21C3346_21C3347_21C3348	0.175419	0.173535	0.192096	0.185977
21C2400_22C0060_22C0061	0.210102	0.148327	0.179637	0.181029
21C3227_22C0104_22C0105	0.179027	0.179224	0.194687	0.182805
21C3119_22C0147_22C0148	0.188469	0.167523	0.184404	0.188756
22C0191-E_22C0192-E_22C0193-E	0.197808	0.207312	0.186781	0.183686
22C0154-E_22C0323-E_22C0324-E	0.188793	0.194699	0.178715	0.188717
22C0379_E_22C0380_E_22C0381_E	0.193484	0.194563	0.176466	0.185961
21C3296_V_22C0361_V_22C0362_V	0.192057	0.189997	0.18218	0.185333
22C0313_E_22C0439_E_22C0440_E	0.164379	0.199934	0.184893	0.187464
21C3278_V_22C0455_V_22C0456_V	0.186927	0.180349	0.193659	0.187192
22C0477_E_22C0478_E_22C0479_E	0.16023	0.194565	0.19398	0.196739
aCGH22619_aCGH24823_aCGH24824	0.136323	0.208629	0.191624	0.224812
22C0326_E_22C0499_E_22C0500_E	0.178057	0.157574	0.187432	0.18171
22C0448_E_22C0586_E_22C0587_E	0.196011	0.184508	0.177519	0.188617
22C0695_E_22C0696_E22C0697_E	0.161016	0.189642	0.227325	0.225032
22C0335_V_22C0844_V_22C0845_V	0.163424	0.192482	0.189802	0.179968
22C0937_E_22C0938_E_22C0939_E	0.209612	0.185773	0.17037	0.190181
22C0903_V_22C0905_V_22C0906_V	0.159746	0.215048	0.186701	0.187033
22C0636_V_22C0955_V_22C0956_V	0.182289	0.196885	0.186692	0.181016
22C0974_E_22C0975_E_22C0976_E	0.182592	0.183315	0.18239	0.180117
22C0161_V_22C1113_V_22C1114_V	0.174709	0.177068	0.196422	0.198178
22C1256_E_22C1257_E_22C1258_E	0.174901	0.181317	0.189793	0.190991
22C1049_V_22C1282_V_22C1283_V	0.155431	0.174476	0.192073	0.195438
22C1356_E_22C1423_E_22C1424_E	0.149744	0.180277	0.188152	0.181647
22C1489_E_22C1490_E_22C1491_E	0.186326	0.168748	0.179718	0.186067
22C1499_E_22C1500_E_22C1501_E	0.160923	0.154241	0.180903	0.180424
22C1269-V_22C1540-V_22C1541-V	0.173758	0.17987	0.188977	0.18165
22C1246_V_22C1607_V_22C1608_V	0.14005	0.380999	0.188371	0.376843
22C1637_E_22C1638_E_22C1639_E	0.202477	0.154199	0.180801	0.18649
22C1660_E_22C1661_E_22C1662_E	0.183871	0.150374	0.181295	0.180731
22C1687_E_22C1714_E_22C1715_E	0.196449	0.188642	0.192126	0.187453
22C1358_aCGH26115_aCGH26116	0.20786	0.176299	0.169174	0.162018
22C1749_E_22C1750_E_22C1751_E	0.17941	0.20278	0.183312	0.194281
22C1836_E_22C1837_E_22C1838_E	0.178641	0.149985	0.184971	0.170383
22C1818_E_22C1819_E_22C1820_E	0.167702	0.202912	0.185872	0.188134
22C1814_V_22C1815_V_22C1816_V	0.230769	0.181016	0.193107	0.175585
22C1876_E_22C1877_E_22C1878_E	0.14245	0.194606	0.176229	0.182417
22C1635_E_22C1921_E_22C1922_E	0.18658	0.200797	0.178597	0.180479
22C2012-E_22C2013-E_22C2014-E	0.138105	0.189062	0.179605	0.181715
22C0042-E_22C0234-E_22C0235-E	0.191269	0.159939	0.179127	0.176573
aCGH21514_aCGH21515_aCGH21516	0.200316	0.142564	0.18563	0.188417
22C2259_E_22C2260_E_22C2261_E	0.180919	0.181746	0.187364	0.190753
22C2220_E_22C2314_E_22C2315_E	0.181274	0.225195	0.192478	0.186682
22C2387_E_22C2388_E_22C2389_E	0.1459	0.169921	0.215211	0.232941
22C2236_E_22C2404_E_22C2405_E	0.173971	0.185367	0.193242	0.19359
22C2237_E_22C2464_E_22C2465_E	0.1699	0.17267	0.181352	0.192537
22C1957_V_22C2396_V_22C2397_V	0.168914	0.187982	0.181275	0.178853
22C2490_E_22C2491_E_22C2492_E	0.195309	0.168629	0.192574	0.188803
21C2657_21C2903_21C2904	0.159389	0.161319	0.179808	0.174401
21C2075_21C3199_21C3200	0.18145	0.194379	0.194689	0.188298
20C2701_aCGH21249_aCGH21250	0.141523	0.184574	0.19191	0.193529
22C0005_aCGH24814_aCGH24815	0.222591	0.123053	0.192742	0.180217

## Sheet: Table S6
Supplementary Table S6. Analytical results among 20 trios with mate-pair libraries and sequenced by MGISeq-2000
Family	Trios (pat)	Trios (mat)	Duos (pat)	Duos (mat)
22C0186_22C0169_22C0170	0.213024	0.143844	0.180384	0.160915
22C0284_22C0285_22C0286	0.185502	0.169695	0.185072	0.178286
22C0552_22C0553_22C0554	0.160357	0.16688	0.176188	0.168492
22C0658_22C0659_22C0660	0.194404	0.165413	0.173584	0.167748
22C0342_22C0790_22C0791	0.175025	0.181791	0.180267	0.168388
22C1809_22C1811_22C1812	0.172343	0.195392	0.175282	0.172692
22C1745_22C1720_22C1721	0.174939	0.157455	0.18195	0.166665
22C2144_22C2145_22C2146	0.215508	0.185485	0.18142	0.165275
22C2479_22C2480_22C2493	0.187932	0.143872	0.191105	0.172485
22C2524_22C2525_22C2526	0.222192	0.173045	0.185998	0.165651
22C2627_22C2628_22C2630	0.200107	0.15748	0.17842	0.165282
22C2933_22C2934_22C2935	0.19758	0.175311	0.179506	0.169113
22C2987_22C2988_22C2989	0.186737	0.181436	0.17631	0.171718
22C2793_22C2795_22C2796	0.1703	0.137487	0.176334	0.168026
23C0254_23C0255_23C0256	0.186791	0.169878	0.178503	0.16316
23C0329_23C0330_23C0331	0.207191	0.163676	0.217782	0.206304
23C0407_23C0408_23C0409	0.182233	0.160102	0.172028	0.167043
21C2959_21C2960_21C2964	0.200484	0.162741	0.164871	0.166119
21C2186_21C2483_21C2484	0.17851	0.172232	0.175121	0.166327
21C2204_21C2205_21C2206	0.168536	0.178213	0.172315	0.159857

## Sheet: Table S7
Supplementary Table S7. Analytical results among 50 trios with small-insert libraries and sequenced by NovaSeq
Family	Trios (pat)	Trios (mat)	Duos (pat)	Duos (mat)
HG01084_HG01083_HG01082	0.197019	0.152419	0.224726	0.224389
HG00405_HG00404_HG00403	0.188354	0.191041	0.184769	0.182968
HG00408_HG00407_HG00406	0.16404	0.182744	0.184746	0.175465
HG00420_HG00419_HG00418	0.192878	0.146659	0.17999	0.18896
HG00423_HG00422_HG00421	0.19884	0.140442	0.183089	0.182625
HG00429_HG00428_HG00427	0.186334	0.166556	0.182904	0.18163
HG00438_HG00437_HG00436	0.17026	0.227401	0.181707	0.183671
HG00459_HG00458_HG00457	0.160354	0.183553	0.181703	0.184886
HG00474_HG00473_HG00472	0.175003	0.153493	0.173615	0.185549
HG00514_HG00513_HG00512	0.199894	0.163891	0.178626	0.18319
HG00526_HG00525_HG00524	0.18336	0.154703	0.186285	0.174652
HG00558_HG00557_HG00556	0.225335	0.134291	0.183131	0.181924
HG00561_HG00560_HG00559	0.141557	0.205199	0.184814	0.188701
HG00567_HG00566_HG00565	0.204478	0.139373	0.186265	0.1804
HG00591_HG00590_HG00589	0.151699	0.195318	0.17955	0.19288
HG00582_HG00581_HG00580	0.203413	0.201486	0.182578	0.1906
HG00585_HG00584_HG00583	0.166861	0.173437	0.191936	0.181318
HG00639_HG00638_HG00637	0.17128	0.163026	0.230457	0.221709
HG00642_HG00641_HG00640	0.134771	0.186049	0.217449	0.216726
HG00733_HG00732_HG00731	0.226231	0.150359	0.214236	0.205726
HG00738_HG00737_HG00736	0.175883	0.205238	0.229338	0.21488
HG00741_HG00740_HG00739	0.196764	0.190977	0.225265	0.216565
HG01050_HG01049_HG01048	0.17294	0.186272	0.224468	0.230001
HG01053_HG01052_HG01051	0.210327	0.175201	0.24164	0.23464
HG01056_HG01055_HG01054	0.195844	0.177942	0.211454	0.210246
HG01062_HG01061_HG01060	0.169929	0.176037	0.216572	0.215888
HG01068_HG01067_HG01066	0.198566	0.150809	0.218377	0.221598
HG01071_HG01070_HG01069	0.173979	0.165767	0.221128	0.216665
HG01074_HG01073_HG01072	0.198886	0.162802	0.204673	0.219555
HG01081_HG01080_HG01079	0.208834	0.17123	0.214035	0.216901
HG01087_HG01086_HG01085	0.139	0.167905	0.21258	0.222504
HG01096_HG01095_HG01094	0.142464	0.155322	0.230776	0.225185
HG01099_HG01098_HG01097	0.168099	0.172642	0.219835	0.217721
HG01100_HG01248_HG01247	0.188634	0.194644	0.238082	0.218259
HG01169_HG01168_HG01167	0.216417	0.171813	0.228218	0.221892
HG01103_HG01102_HG01101	0.18511	0.182042	0.211112	0.220219
HG01114_HG01113_HG01112	0.183278	0.170318	0.220836	0.21116
HG01126_HG01125_HG01124	0.175603	0.152351	0.218778	0.216148
HG01135_HG01134_HG01133	0.179333	0.172865	0.210713	0.21166
HG01138_HG01137_HG01136	0.19797	0.17614	0.210739	0.209167
HG01141_HG01140_HG01139	0.208189	0.181145	0.228165	0.213895
HG01150_HG01149_HG01148	0.174833	0.204011	0.207394	0.218509
HG01252_HG01251_HG01250	0.183761	0.161161	0.21725	0.21038
HG01255_HG01254_HG01253	0.163317	0.16294	0.227513	0.218849
HG01258_HG01257_HG01256	0.203154	0.179659	0.217412	0.215657
HG01261_HG01260_HG01259	0.176722	0.169798	0.213078	0.221741
HG01273_HG01272_HG01271	0.206838	0.153328	0.230848	0.224244
HG01276_HG01275_HG01274	0.185076	0.145627	0.22665	0.209598
HG01279_HG01278_HG01277	0.19503	0.188049	0.202505	0.189291
HG01349_HG01348_HG01347	0.220723	0.154881	0.211946	0.214135
